# Supplementary material for: Influence of Anti-Infective Periodontal Therapy on Subgingival Microbiota Evaluated by Chair-Side Test Compared to qPCR—A Clinical Follow-Up Study
Source: MDPI journal article supplement (doi:10.3390/antibiotics11050577), 2022-04-26
Supplement: s1 [file s1]

**Influence of anti-infective periodontal therapy on subgingival microbiota evaluated by chair-side test compared to qPCR - a clinical follow-up study**

|                              | Item No | Recommendation                                                                                                                                                                     | Page |
|------------------------------|---------|------------------------------------------------------------------------------------------------------------------------------------------------------------------------------------|------|
| Title and abstract           | 1       | (a) Indicate the study’s design with a commonly used term in the title or the                                                                                                      | 1    |
|                              |         | (b) Provide in the abstract an informative and balanced summary of what was done                                                                                                   | 1    |
| Introduction                 |         |                                                                                                                                                                                    |      |
| Background/rationale         | 2       | Explain the scientific background and rationale for the investigation being                                                                                                        | 1,2  |
| Objectives                   | 3       | State specific objectives, including any prespecified hypotheses                                                                                                                   | 2    |
| Methods                      |         |                                                                                                                                                                                    |      |
| Study design                 | 4       | Present key elements of study design early in the paper                                                                                                                            | 6    |
| Setting                      | 5       | Describe the setting, locations, and relevant dates, including periods of recruitment,                                                                                             | 6    |
| Participants                 | 6       | (a) Cohort study—Give the eligibility criteria, and the sources and methods of selection of participants. Describe methods of follow-up                                            | N/A  |
|                              |         | Case-control study—Give the eligibility criteria, and the sources and methods of case ascertainment and control selection. Give the rationale for the choice of cases and controls |      |
|                              |         | Cross-sectional study—Give the eligibility criteria, and the sources and methods of                                                                                                |      |
|                              |         | (b) Cohort study—For matched studies, give matching criteria and number of exposed and unexposed                                                                                   | N/A  |
|                              |         | Case-control study—For matched studies, give matching criteria and the number of                                                                                                   |      |
| Variables                    | 7       | Clearly define all outcomes, exposures, predictors, potential confounders, and effect                                                                                              | 7,8  |
| Data sources/<br>measurement | 8*      | For each variable of interest, give sources of data and details of methods of assessment (measurement). Describe comparability of assessment methods if there                      | N/A  |
| Bias                         | 9       | Describe any efforts to address potential sources of bias                                                                                                                          | 8,9  |
| Study size                   | 10      | Explain how the study size was arrived at                                                                                                                                          | 8,9  |
| Quantitative variables       | 11      | Explain how quantitative variables were handled in the analyses. If applicable, describe which groupings were chosen and why                                                       | 7    |
| Statistical methods          | 12      | (a) Describe all statistical methods, including those used to control for                                                                                                          | 9    |
|                              |         | (b) Describe any methods used to examine subgroups and interactions                                                                                                                | 9    |
|                              |         | (c) Explain how missing data were addressed                                                                                                                                        | 7    |
|                              |         | (d) Cohort study—If applicable, explain how loss to follow-up was addressed                                                                                                        | N/A  |
|                              |         | Case-control study—If applicable, explain how matching of cases and controls was addressed                                                                                         |      |
|                              |         | Cross-sectional study—If applicable, describe analytical methods taking account of                                                                                                 |      |
|                              |         | (e) Describe any sensitivity analyses                                                                                                                                              | N/A  |

Continued on next page

| Results                  |     |                                                                                                                                                                                                                | Page                    |
|--------------------------|-----|----------------------------------------------------------------------------------------------------------------------------------------------------------------------------------------------------------------|-------------------------|
| Participants             | 13* | (a) Report numbers of individuals at each stage of study—e.g. numbers potentially eligible, examined for eligibility, confirmed eligible, included in the study, completing follow-up, and analyzed            | 2,3                     |
|                          |     | (b) Give reasons for non-participation at each stage                                                                                                                                                           | 2,7                     |
|                          |     | (c) Consider use of a flow diagram                                                                                                                                                                             | Fig 2                   |
| Descriptive data         | 14* | (a) Give characteristics of study participants (e.g. demographic, clinical, social) and information on exposures and potential confounders                                                                     | 2,3,4                   |
|                          |     | (b) Indicate number of participants with missing data for each variable of interest                                                                                                                            | 2,7                     |
|                          |     | (c) <i>Cohort study</i> —Summarize follow-up time (e.g., average and total amount)                                                                                                                             | N/A                     |
| Outcome data             | 15* | <i>Cohort study</i> —Report numbers of outcome events or summary measures over time                                                                                                                            | N/A                     |
|                          |     | <i>Case-control study</i> —Report numbers in each exposure category, or summary measures of exposure                                                                                                           | N/A                     |
|                          |     | <i>Cross-sectional study</i> —Report numbers of outcome events or summary measures                                                                                                                             | N/A                     |
| Main results             | 16  | (a) Give unadjusted estimates and, if applicable, confounder-adjusted estimates and their precision (e.g., 95% confidence interval). Make clear which confounders were adjusted for and why they were included | 3,4/Tables/<br>Figure 1 |
|                          |     | (b) Report category boundaries when continuous variables were categorized                                                                                                                                      | N/A                     |
|                          |     | (c) If relevant, consider translating estimates of relative risk into absolute risk for a meaningful time period                                                                                               | N/A                     |
| Other analyses           | 17  | Report other analyses done—e.g. analyses of subgroups and interactions, and sensitivity analyses                                                                                                               | 3, Table 2              |
| <b>Discussion</b>        |     |                                                                                                                                                                                                                |                         |
| Key results              | 18  | Summarize key results with reference to study objectives                                                                                                                                                       | 5,6                     |
| Limitations              | 19  | Discuss limitations of the study, taking into account sources of potential bias or imprecision. Discuss both direction and magnitude of any potential bias                                                     | 6                       |
| Interpretation           | 20  | Give a cautious overall interpretation of results considering objectives, limitations, multiplicity of analyses, results from similar studies, and other relevant evidence                                     | 5,6                     |
| Generalizability         | 21  | Discuss the generalizability (external validity) of the study results                                                                                                                                          | 6                       |
| <b>Other information</b> |     |                                                                                                                                                                                                                |                         |
| Funding                  | 22  | Give the source of funding and the role of the funders for the present study and, if applicable, for the original study on which the present article is based                                                  | 10                      |

\*Give information separately for cases and controls in case-control studies and, if applicable, for exposed and unexposed groups in cohort and cross-sectional studies.
